# Supplementary material
Source: HighWire-hosted journal article supplement (doi:10.1101/rna.053793.115)
Supplement: SuppFigLegends.docx [file SuppFigLegends.docx]

**SFig. 1. Animals showing different vulval phenotypes.** Typical images of animals exhibiting specific vulval phenotypes (as labelled on top left of panel). The red asterisks denote the vulva or where a vulva should have been formed. Each black bar represents 10 uM.

**SFig. 2. (A)** Percentages of animals in the different vulval phenotypic categories. Each line assayed is represented on a different row and each vulval phenotypic category is represented in a different column. "Total" refers to the total number of transgenic animals assayed for each lin4_m/lin4_cm line. "% Vulval rescue" includes transgenic animals exhibiting egg‑laying, pvl or bursting phenotypes. The lines are grouped according to specific *lin-4* mutation. The "average" row shows the average percentages across the different transgenic lines for each *lin-4* mutation. The "error of mean" row shows the standard error of mean across the different lines for each *lin-4* mutation. **(i)** lin4_m transgenic lines. **(ii)** lin4_cm mutant lines. **(B)** Percentages of sequenced *lin‑4* or *lin‑4* seed variant species in lin4_m transgenic lines. Information about each transgenic line is listed in a different row. "# *lin‑4* reads" refers to the total number of reads corresponding to *lin‑4* or its variants. "% of microRNAs" refers to the average percentages of sequenced *lin‑4* species as a fraction of total sequenced microRNAs. "Total reads" refers to the total number of sequenced reads prior to any alignments. **(C)** Binding sites in *lin‑28* and *hbl‑1* 3' UTRs (bottom, redrawn from Abrahante et al. 2003; Moss et al. 1997) are aligned against *lin‑4* mature microRNA (top). Dots indicate absent bases at those positions; dashes indicate one or more non‑complementary bases. Lowercase letters represent complementary bases as a result of mutations made in lin4_m constructs. First miRNA nucleotides and alignments of 5' ends of binding sites have been included for completeness although their functionalities have not been demonstrated. Coloured bars represent levels of *lin‑4* vulval rescue (grey = 0.0%, yellow = 50.0% and green = 100%) for mutations at specific positions. A position that is highlighted by two coloured bars has two different mutations at the same position and each colour represents the rescue activity of each specific mutation. **(D)** Predicted minimum binding energy hybridisation (mfe) between target 3' UTR and *lin‑4* sequences from RNAHybrid. **(i)** Percentages of transgenic animals showing rescue of *lin‑4* vulvaless phenotype are plotted against mfe values. The plots in the first three columns (left) are minimum free energy (mfe) estimates from the *lin‑4* seed sequence while the last three columns (right) are mfe estimates from the *lin‑4* microRNA. The three most favourable mfe values are plotted in order from left to right. Each row represents mfe estimates from a specific target 3' UTR. The plots on the bottom row graph the average of the three mfe values across the target 3' UTRs. **(ii)** The three most favourable mfe values for each target 3' UTR are listed for the full *lin‑4* mature microRNA (above) and *lin‑4* seed sequence (below). "Average" refers to the average of the three mfe values across the target 3' UTRs. The percentages of transgenic animals showing rescue of the vulvaless phenotype (Fig. 1B) are listed in the last column for comparison.

**SFig. 3. (A)** Percentages of transgenic animals in the different vulval phenotypic categories for let7_m constructs. Each transgenic line assayed is represented on a different row and each vulval phenotypic category is represented in a different column. "Total" refers to the total number of transgenic animals assayed for each let7_m line. "% Rescue (bursting)" includes transgenic animals exhibiting egg‑laying and pvl phenotypes. The transgenic lines are grouped according to specific let7_m construct. The "average" row shows the average percentages across the different transgenic lines for each let7_m construct. The "error of mean" row shows the standard error of mean across the different transgenic lines for each let7_m construct. **(B)** Percentages of transgenic animals exhibiting rescue of adult alae formation for let7_m constructs. Each transgenic line assayed is represented on a different row. "Total" refers to the total number of transgenic animals assayed for each let7_m line. The "average" row shows the average percentages across the different transgenic lines for each let7_m construct. The "error of mean" row shows the standard error of mean across the different transgenic lines for each let7_m construct. **(C)** Percentages of sequenced *let‑7* or *let‑7* seed variant species in let7_m transgenic lines. Information about each transgenic line is listed in a different row. "# *let‑7* reads" refers to the total number of reads corresponding to *let‑7* or its variants. "% of microRNAs" refers to the average percentages of sequenced *let‑7* species as a fraction of total sequenced microRNAs. "Total reads" refers to the total number of sequenced reads prior to any alignments. **(D)** Binding sites in target 3' UTRs (bottom) are aligned against *let‑7* mature microRNA (top). Dots indicate absent bases at those positions; dashes indicate one or more non‑complementary bases. Lowercase letters represent complementary bases as a result of mutations made in let7_m constructs. First miRNA nucleotides and alignments of 5' ends of binding sites have been included for completeness although their functionalities have not been demonstrated. Coloured bars represent levels of *let‑7* activities (grey = 0.0%, yellow = 50.0% and green = 100%, top set = rescue of egg‑laying and bottom set = rescue of adult alae formation) for mutations at specific positions. The multiple mutations are not depicted here. **(i)** *lin‑14* [redrawn from Lewis et al. 2003; Reinhart et al. 2000]*.* **(ii)** *hbl‑1* [redrawn from Abrahante et al. 2003; Lewis et al. 2003]. **(iii)** *daf‑12 and lin‑28* [redrawn from Grosshans et al. 2005; Lewis et al. 2003]*.* **(E)** Predictedminimum binding energy hybridisation (mfe) estimates (RNAhybrid) between target 3' UTR and *let‑7* sequences. Percentages of transgenic animals showing rescue of *let‑7* mutant phenotypes [**(i)** adult alae formation **(ii)** egg‑laying] are plotted against mfe values. The plots in the first three columns (left) are mfe estimates from the *let‑7* seed sequence while the last three columns (right) are mfe estimates from the *let‑7* microRNA. The three most favourable mfe values are plotted in order from left to right. Each row represents mfe estimates from a specific target 3' UTR. The plots on the bottom row graph the average of the three mfe estimates across the target 3' UTRs used in this analysis. **(iii)** The three most favourable mfe values for each target 3' UTR are listed for the full *let‑7* mature microRNA (above) and *let‑7* seed sequence (below). "Average" refers to the average of the three mfe values across the target 3' UTRs. Percentages of transgenic animals showing rescue of egg‑laying and adult alae format­­­­ion phenotypes (Fig. 2B) are listed for comparison. **(F)** Analyses of *let‑7* mutants at position 5 or 5*. The RNA structure represents part of the *let‑7* precursor (seed sequence in light blue box). Red and purple letters represent the wildtype residues of interest and corresponding mutations respectively. The table below summarises rescue of *let‑7* bursting phenotype in the different mutant lines. Results for the transgenic lines (let7_m) and CRISPR/Cas9-derived mutant lines (let7_cm) are in black and blue respectively. "% Rescue” includes animals exhibiting egg‑laying or pvl phenotypes. n refers to total number of animals assayed for each let7_m/let7_cm mutation, with the subsequent value in parentheses referring to the total number of independent lines assayed.
