# Supplementary material
Source: HighWire-hosted journal article supplement (doi:10.1101/rna.053793.115)
Supplement: SuppFigures.pdf [file SuppFigures.pdf]

**Figure S1**

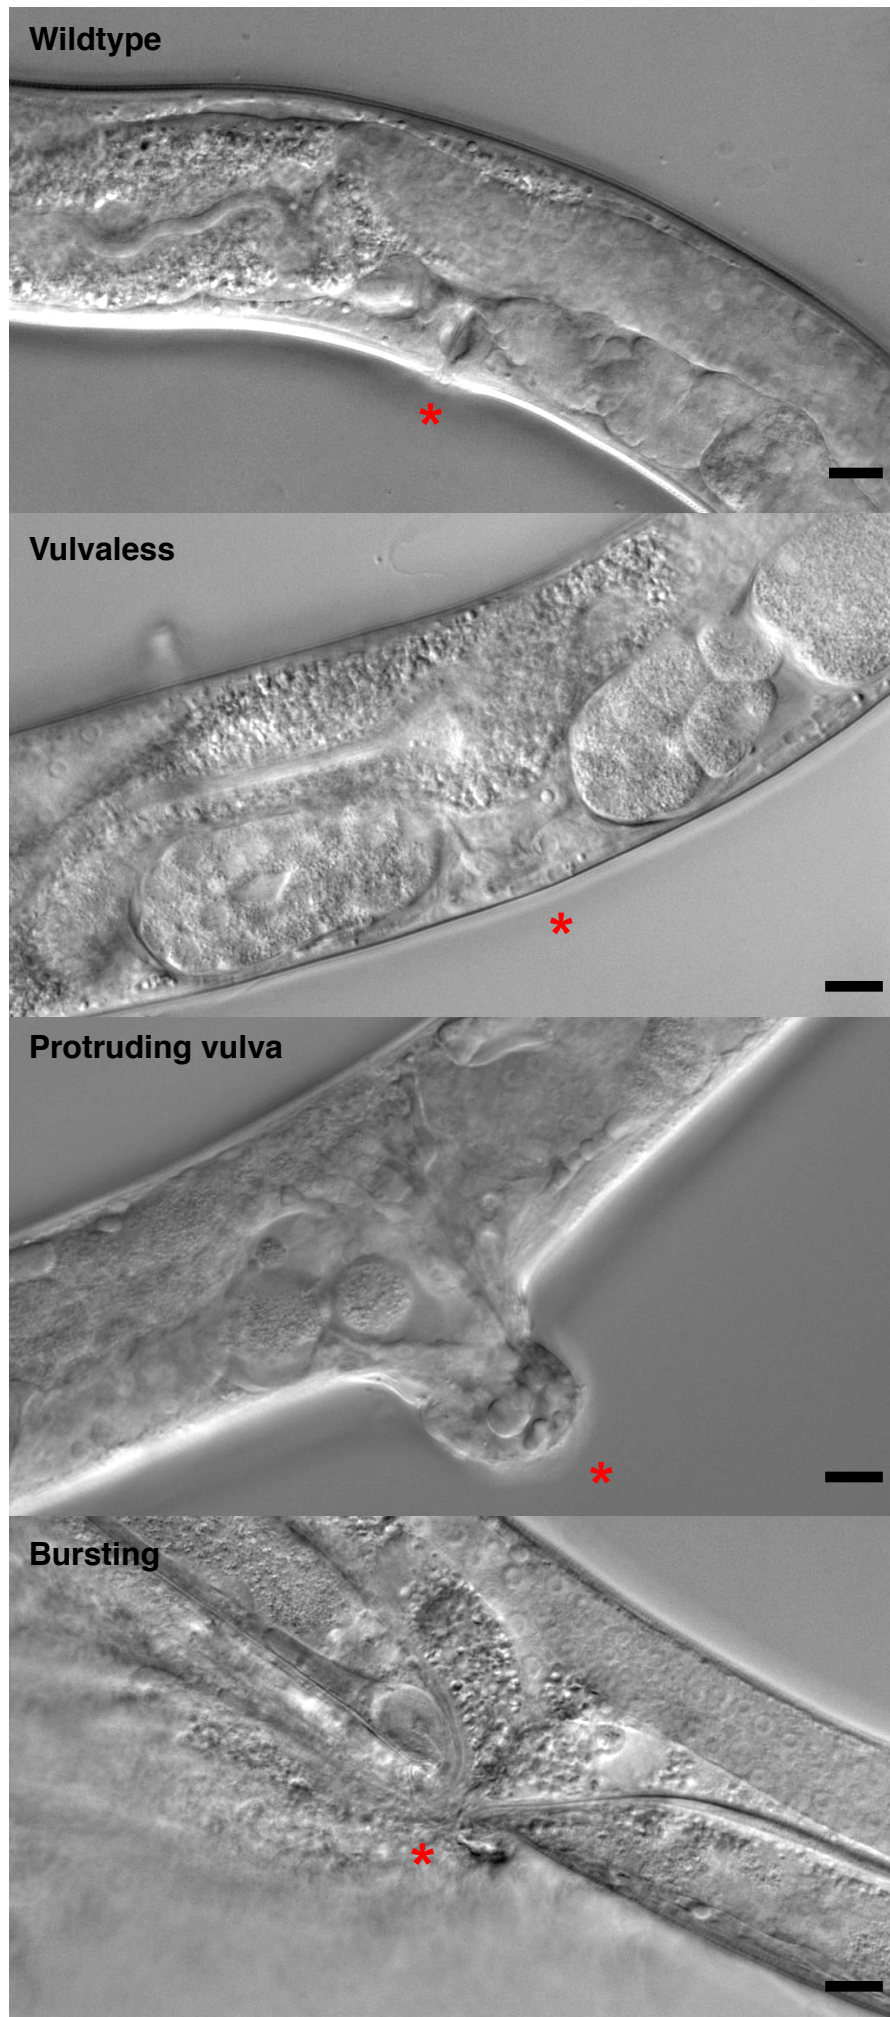

Figure S2Ai

| lin4_m1       |              |       |            |             |       |                 |  |
|---------------|--------------|-------|------------|-------------|-------|-----------------|--|
| Line          | % Egg-laying | % Pvl | % Bursting | % Vulvaless | Total | % Vulval rescue |  |
| #208.2.2.1    | 1.9          | 40.6  | 36.8       | 20.8        | 106   | 79.2            |  |
| #208.3.1.0    | 0.0          | 8.1   | 19.5       | 72.4        | 123   | 27.6            |  |
| #208.3.2.1    | 7.0          | 43.4  | 27.1       | 22.5        | 129   | 77.5            |  |
| #208.3.2.2    | 39.6         | 34.7  | 16.0       | 9.7         | 144   | 90.3            |  |
| #209a.1.1.1   | 8.2          | 43.9  | 26.5       | 21.4        | 98    | 78.6            |  |
| #209a.1.1.2   | 33.3         | 40.7  | 19.5       | 6.5         | 123   | 93.5            |  |
| #209a.3.1.1   | 38.1         | 42.9  | 16.2       | 2.9         | 105   | 97.1            |  |
| Average       | 18.3         | 36.3  | 23.1       | 22.3        | -     | 77.7            |  |
| Error of mean | 6.7          | 4.8   | 2.8        | 8.9         | -     | 8.9             |  |

  

| lin4_m2       |              |       |            |             |       |                 |  |
|---------------|--------------|-------|------------|-------------|-------|-----------------|--|
| Line          | % Egg-laying | % Pvl | % Bursting | % Vulvaless | Total | % Vulval rescue |  |
| #210.1.1.0    | 0.9          | 25.5  | 22.6       | 50.9        | 106   | 49.1            |  |
| #210.1.2.0    | 0.0          | 25.7  | 39.6       | 34.7        | 101   | 65.3            |  |
| #210.1.2.1    | 0.0          | 14.0  | 7.5        | 78.5        | 107   | 21.5            |  |
| #211.1.1.1    | 0.0          | 10.2  | 28.1       | 61.7        | 128   | 38.3            |  |
| #211.2.1.1    | 4.3          | 35.0  | 39.3       | 21.4        | 117   | 78.6            |  |
| Average       | 1.0          | 22.1  | 27.4       | 49.4        | -     | 50.6            |  |
| Error of mean | 0.8          | 4.5   | 6.0        | 10.0        | -     | 10.0            |  |

  

| lin4_m3       |              |       |            |             |       |                 |  |
|---------------|--------------|-------|------------|-------------|-------|-----------------|--|
| Line          | % Egg-laying | % Pvl | % Bursting | % Vulvaless | Total | % Vulval rescue |  |
| #212a.1.1.0   | 0.0          | 3.7   | 18.3       | 78.0        | 109   | 22.0            |  |
| #212a.3.1.0   | 0.9          | 2.6   | 0.0        | 96.6        | 116   | 3.4             |  |
| #212a.4.1.0   | 0.0          | 1.7   | 3.4        | 95.0        | 119   | 5.0             |  |
| #213.1.1.1    | 1.1          | 2.2   | 0.0        | 96.7        | 91    | 3.3             |  |
| #213.1.2.1    | 0.0          | 0.8   | 0.0        | 99.2        | 121   | 0.8             |  |
| #213.1.3.1    | 0.0          | 1.0   | 1.0        | 98.0        | 100   | 2.0             |  |
| Average       | 0.3          | 2.0   | 3.8        | 93.9        | -     | 6.1             |  |
| Error of mean | 0.2          | 0.4   | 3.0        | 3.2         | -     | 3.2             |  |

  

| lin4_m4       |              |       |            |             |       |                 |  |
|---------------|--------------|-------|------------|-------------|-------|-----------------|--|
| Line          | % Egg-laying | % Pvl | % Bursting | % Vulvaless | Total | % Vulval rescue |  |
| #199.3.1.1    | 0.0          | 1.1   | 2.1        | 96.8        | 94    | 3.2             |  |
| #199.3.2.1    | 0.0          | 1.9   | 1.9        | 96.2        | 209   | 3.8             |  |
| Average       | 0.0          | 1.5   | 2.0        | 96.5        | -     | 3.5             |  |
| Error of mean | 0.0          | 0.4   | 0.1        | 0.3         | -     | 0.3             |  |

  

| lin4_m5       |              |       |            |             |       |                 |  |
|---------------|--------------|-------|------------|-------------|-------|-----------------|--|
| Line          | % Egg-laying | % Pvl | % Bursting | % Vulvaless | Total | % Vulval rescue |  |
| #215.1.1.1    | 0.0          | 0.8   | 5.6        | 93.7        | 126   | 6.3             |  |
| #215.2.1.1    | 0.0          | 0.0   | 0.9        | 99.1        | 110   | 0.9             |  |
| #214.3.1.0    | 0.8          | 8.3   | 11.6       | 79.3        | 121   | 20.7            |  |
| #214.3.1.1    | 0.0          | 6.8   | 10.2       | 83.0        | 88    | 17.0            |  |
| Average       | 0.2          | 4.0   | 7.1        | 88.8        | -     | 11.2            |  |
| Error of mean | 0.2          | 2.1   | 2.4        | 4.6         | -     | 4.6             |  |

  

| lin4_m6     |              |       |            |             |       |                 |  |
|-------------|--------------|-------|------------|-------------|-------|-----------------|--|
| Line        | % Egg-laying | % Pvl | % Bursting | % Vulvaless | Total | % Vulval rescue |  |
| #237a.3.1.0 | 0.0          | 0.0   | 0.0        | 100.0       | 128   | 0               |  |

  

| lin4_m7       |              |       |            |             |       |                 |  |
|---------------|--------------|-------|------------|-------------|-------|-----------------|--|
| Line          | % Egg-laying | % Pvl | % Bursting | % Vulvaless | Total | % Vulval rescue |  |
| #216.1.1.0    | 0.0          | 9.9   | 16.6       | 73.5        | 151   | 26.5            |  |
| #216.1.1.1    | 0.0          | 5.1   | 7.6        | 87.3        | 118   | 12.7            |  |
| #216.1.1.2    | 0.0          | 3.5   | 2.6        | 93.9        | 114   | 6.1             |  |
| #216.1.2.1    | 0.0          | 2.9   | 5.9        | 91.2        | 102   | 8.8             |  |
| #216.1.3.1    | 0.0          | 2.5   | 13.1       | 84.4        | 122   | 15.6            |  |
| #217.1.1.1    | 0.0          | 22.2  | 15.9       | 61.9        | 126   | 38.1            |  |
| #217.3.1.0    | 1.6          | 18.0  | 17.2       | 63.3        | 128   | 36.7            |  |
| #217.3.2.0    | 0.0          | 20.5  | 11.4       | 68.2        | 88    | 31.8            |  |
| Average       | 0.2          | 10.6  | 11.9       | 78.0        | -     | 22.0            |  |
| Error of mean | 0.2          | 3.0   | 1.3        | 4.5         | -     | 4.5             |  |

  

| lin4_m8       |              |       |            |             |       |                 |  |
|---------------|--------------|-------|------------|-------------|-------|-----------------|--|
| Line          | % Egg-laying | % Pvl | % Bursting | % Vulvaless | Total | % Vulval rescue |  |
| #241.2.1.0    | 0.0          | 5.8   | 9.9        | 84.3        | 121   | 15.7            |  |
| #240A.1.2.0   | 0.0          | 6.0   | 2.4        | 91.7        | 84    | 8.3             |  |
| #240A.1.3.0   | 0.0          | 0.0   | 0.0        | 100.0       | 79    | 0.0             |  |
| Average       | 0.0          | 3.9   | 4.1        | 92.0        | -     | 8.0             |  |
| Error of mean | 0.0          | 2.0   | 3.0        | 4.5         | -     | 4.5             |  |

  

| lin4_m9       |              |       |            |             |       |                 |  |
|---------------|--------------|-------|------------|-------------|-------|-----------------|--|
| Line          | % Egg-laying | % Pvl | % Bursting | % Vulvaless | Total | % Vulval rescue |  |
| #243.2.1.1    | 51.8         | 27.7  | 13.3       | 7.2         | 83    | 92.8            |  |
| #242A.1.1.0   | 16.9         | 49.4  | 20.5       | 13.3        | 83    | 86.7            |  |
| #242A.1.2.0   | 27.7         | 36.2  | 25.5       | 10.5        | 94    | 89.4            |  |
| #242A.1.3.0   | 17.7         | 29.1  | 39.2       | 13.9        | 79    | 88.1            |  |
| Average       | 28.5         | 35.6  | 24.6       | 11.3        | -     | 86.7            |  |
| Error of mean | 8.1          | 5.0   | 5.5        | 1.5         | -     | 1.5             |  |

  

| lin4_m10      |              |       |            |             |       |                 |  |
|---------------|--------------|-------|------------|-------------|-------|-----------------|--|
| Line          | % Egg-laying | % Pvl | % Bursting | % Vulvaless | Total | % Vulval rescue |  |
| #235.2.1.1    | 0.0          | 17.0  | 10.4       | 72.6        | 106   | 27.4            |  |
| #234B.1.3.0   | 0.0          | 5.8   | 14.0       | 80.2        | 86    | 19.8            |  |
| Average       | 0.0          | 11.4  | 12.2       | 76.4        | -     | 23.6            |  |
| Error of mean | 0.0          | 5.6   | 1.8        | 3.8         | -     | 3.8             |  |

  

| lin4_m11      |              |       |            |             |       |                 |  |
|---------------|--------------|-------|------------|-------------|-------|-----------------|--|
| Line          | % Egg-laying | % Pvl | % Bursting | % Vulvaless | Total | % Vulval rescue |  |
| #238.4.1.0    | 0.0          | 2.0   | 5.0        | 93.1        | 101   | 6.9             |  |
| #239A.1.1.1   | 0.0          | 0.0   | 1.2        | 98.8        | 84    | 1.2             |  |
| Average       | 0.0          | 1.0   | 3.1        | 95.9        | -     | 4.1             |  |
| Error of mean | 0.0          | 1.0   | 1.9        | 2.9         | -     | 2.9             |  |

  

| lin4_m12      |              |       |            |             |       |                 |  |
|---------------|--------------|-------|------------|-------------|-------|-----------------|--|
| Line          | % Egg-laying | % Pvl | % Bursting | % Vulvaless | Total | % Vulval rescue |  |
| 250.1.1.0     | 10.0         | 36.7  | 31.7       | 21.7        | 120   | 78.3            |  |
| 250.2.2.0     | 60.6         | 26.5  | 8.3        | 4.5         | 132   | 95.5            |  |
| 250.2.1.0     | 34.8         | 41.1  | 17.7       | 6.4         | 141   | 93.6            |  |
| Average       | 35.1         | 34.8  | 19.2       | 10.9        | -     | 89.1            |  |
| Error of mean | 14.6         | 4.3   | 6.8        | 5.4         | -     | 5.4             |  |

  

| lin4_m13      |              |       |            |             |       |                 |  |
|---------------|--------------|-------|------------|-------------|-------|-----------------|--|
| Line          | % Egg-laying | % Pvl | % Bursting | % Vulvaless | Total | % Vulval rescue |  |
| 251.1.1.1     | 0.0          | 21.3  | 14.6       | 64.0        | 89    | 36.0            |  |
| 251.1.1.3     | 1.4          | 40.5  | 18.9       | 39.2        | 148   | 60.8            |  |
| 251.1.1.4     | 29.8         | 37.7  | 21.9       | 10.5        | 114   | 89.5            |  |
| 251.1.2.0     | 19.8         | 34.9  | 19.0       | 26.2        | 126   | 73.8            |  |
| 251.1.3.0     | 32.7         | 40.7  | 10.7       | 16.0        | 150   | 84.0            |  |
| 251.1.4.1     | 7.3          | 40.9  | 27.3       | 24.5        | 110   | 75.5            |  |
| Average       | 15.2         | 36.0  | 18.7       | 30.1        | -     | 69.9            |  |
| Error of mean | 5.8          | 3.1   | 2.3        | 7.9         | -     | 7.9             |  |

  

| lin4_m14      |              |       |            |             |       |                 |  |
|---------------|--------------|-------|------------|-------------|-------|-----------------|--|
| Line          | % Egg-laying | % Pvl | % Bursting | % Vulvaless | Total | % Vulval rescue |  |
| 252.1.1.0     | 2.6          | 39.7  | 34.5       | 23.3        | 116   | 76.7            |  |
| 252.2.1.1     | 29.2         | 40.6  | 25.5       | 4.7         | 106   | 95.3            |  |
| Average       | 15.9         | 40.1  | 30.0       | 14.0        | -     | 86.0            |  |
| Error of mean | 13.3         | 0.5   | 4.5        | 9.3         | -     | 9.3             |  |

  

| WT lin-4      |              |       |            |             |       |                 |  |
|---------------|--------------|-------|------------|-------------|-------|-----------------|--|
| Line          | % Egg-laying | % Pvl | % Bursting | % Vulvaless | Total | % Vulval rescue |  |
| #173.1.1.1    | 4.2          | 38.3  | 30.8       | 26.7        | 120   | 73.3            |  |
| #173.3.1.1    | 2.0          | 26.0  | 19.0       | 53.0        | 100   | 47.0            |  |
| #173.3.2.1    | 2.8          | 27.4  | 20.8       | 49.1        | 106   | 50.9            |  |
| #173.3.3.1    | 11.1         | 28.7  | 52.8       | 7.4         | 108   | 92.6            |  |
| #173.3.4.1    | 0.0          | 16.1  | 33.9       | 50.0        | 118   | 50.0            |  |
| #172.1.1.1    | 0.0          | 6.6   | 12.1       | 81.3        | 91    | 18.7            |  |
| #172.1.2.1    | 0.0          | 12.2  | 9.2        | 78.6        | 131   | 21.4            |  |
| #172.1.3.1    | 0.0          | 10.5  | 7.0        | 82.5        | 114   | 17.5            |  |
| #172.1.4.1    | 0.8          | 27.2  | 30.4       | 41.6        | 125   | 58.4            |  |
| Average       | 2.3          | 21.4  | 24.0       | 52.2        | -     | 47.8            |  |
| Error of mean | 1.2          | 3.5   | 4.9        | 8.5         | -     | 8.5             |  |

Figure S2Aii

| lin4_cm2 |              |       |            |             |       |                 |  |
|----------|--------------|-------|------------|-------------|-------|-----------------|--|
| Line     | % Egg-laying | % Pvl | % Bursting | % Vulvaless | Total | % Vulval rescue |  |
| PD1088   | 89.1         | 3.0   | 6.0        | 2.0         | 101   | 98.0            |  |

  

| lin4_cm6 |              |       |            |             |       |                 |  |
|----------|--------------|-------|------------|-------------|-------|-----------------|--|
| Line     | % Egg-laying | % Pvl | % Bursting | % Vulvaless | Total | % Vulval rescue |  |
| PD1093   | 0.0          | 0.0   | 14.8       | 85.2        | 54    | 14.8            |  |

  

| lin4_cm7      |              |       |            |             |       |                 |  |
|---------------|--------------|-------|------------|-------------|-------|-----------------|--|
| Line          | % Egg-laying | % Pvl | % Bursting | % Vulvaless | Total | % Vulval rescue |  |
| PD1095        | 0.0          | 3.2   | 90.3       | 6.5         | 62    | 93.5            |  |
| PD1263        | 0.0          | 0     | 100.0      | 0.0         | 11    | 100.0           |  |
| PD1264        | 0.0          | 9.1   | 90.9       | 0.0         | 11    | 100.0           |  |
| PD1265        | 0.0          | 0     | 90.0       | 10.0        | 10    | 90.0            |  |
| Average       | 0.0          | 3.1   | 92.8       | 4.1         | -     | 95.9            |  |
| Error of mean | 0.0          | 2.1   | 2.4        | 2.5         | -     | 2.93            |  |

  

| lin4_cm11 |              |       |            |             |       |                 |  |
|-----------|--------------|-------|------------|-------------|-------|-----------------|--|
| Line      | % Egg-laying | % Pvl | % Bursting | % Vulvaless | Total | % Vulval rescue |  |
| PD1086    | 1.3          | 0     | 1.3        | 97.4        | 78    | 2.6             |  |

Figure S2B

| Strains      |                 | # lin-4 reads | % microRNAs | total reads |
|--------------|-----------------|---------------|-------------|-------------|
| N2           |                 | 18,703        | 0.97        | 3,423,171   |
| lin-4(e912)  |                 | 0             | 0.00        | 4,133,073   |
| lin-4(ma161) |                 | 1,076         | 0.08        | 2,435,830   |
| WT lin-4     | Line 1448       | 5,386         | 1.12        | 1,796,199   |
|              | Line 1469       | 8,922         | 2.07        | 2,284,580   |
| lin4_m1      | Line 208.3.2.2  | 13,656        | 1.66        | 752,404     |
|              | Line 209a.1.1.2 | 9,780         | 2.40        | 452,985     |
| lin4_m2      | Line 210.1.2.0  | 1,303         | 0.93        | 135,796     |
|              | Line 211.2.1.1  | 3,099         | 0.55        | 854,643     |
| lin4_m3      | Line 212a.1.1.0 | 2,216         | 0.48        | 1,232,863   |
|              | Line 213.1.2.1  | 3,174         | 1.97        | 1,235,272   |
| lin4_m4      | Line 199.3.2.1  | 1,145         | 0.48        | 464,624     |
|              | Line 214.3.1.0  | 6,369         | 1.25        | 501,990     |
| lin4_m5      | Line 215.1.1.1  | 47,833        | 6.91        | 619,924     |
|              | Line 216.1.1.0  | 8,112         | 1.41        | 519,230     |
| lin4_m7      | Line 217.1.1.1  | 4,554         | 0.69        | 666,453     |

Figure S2C

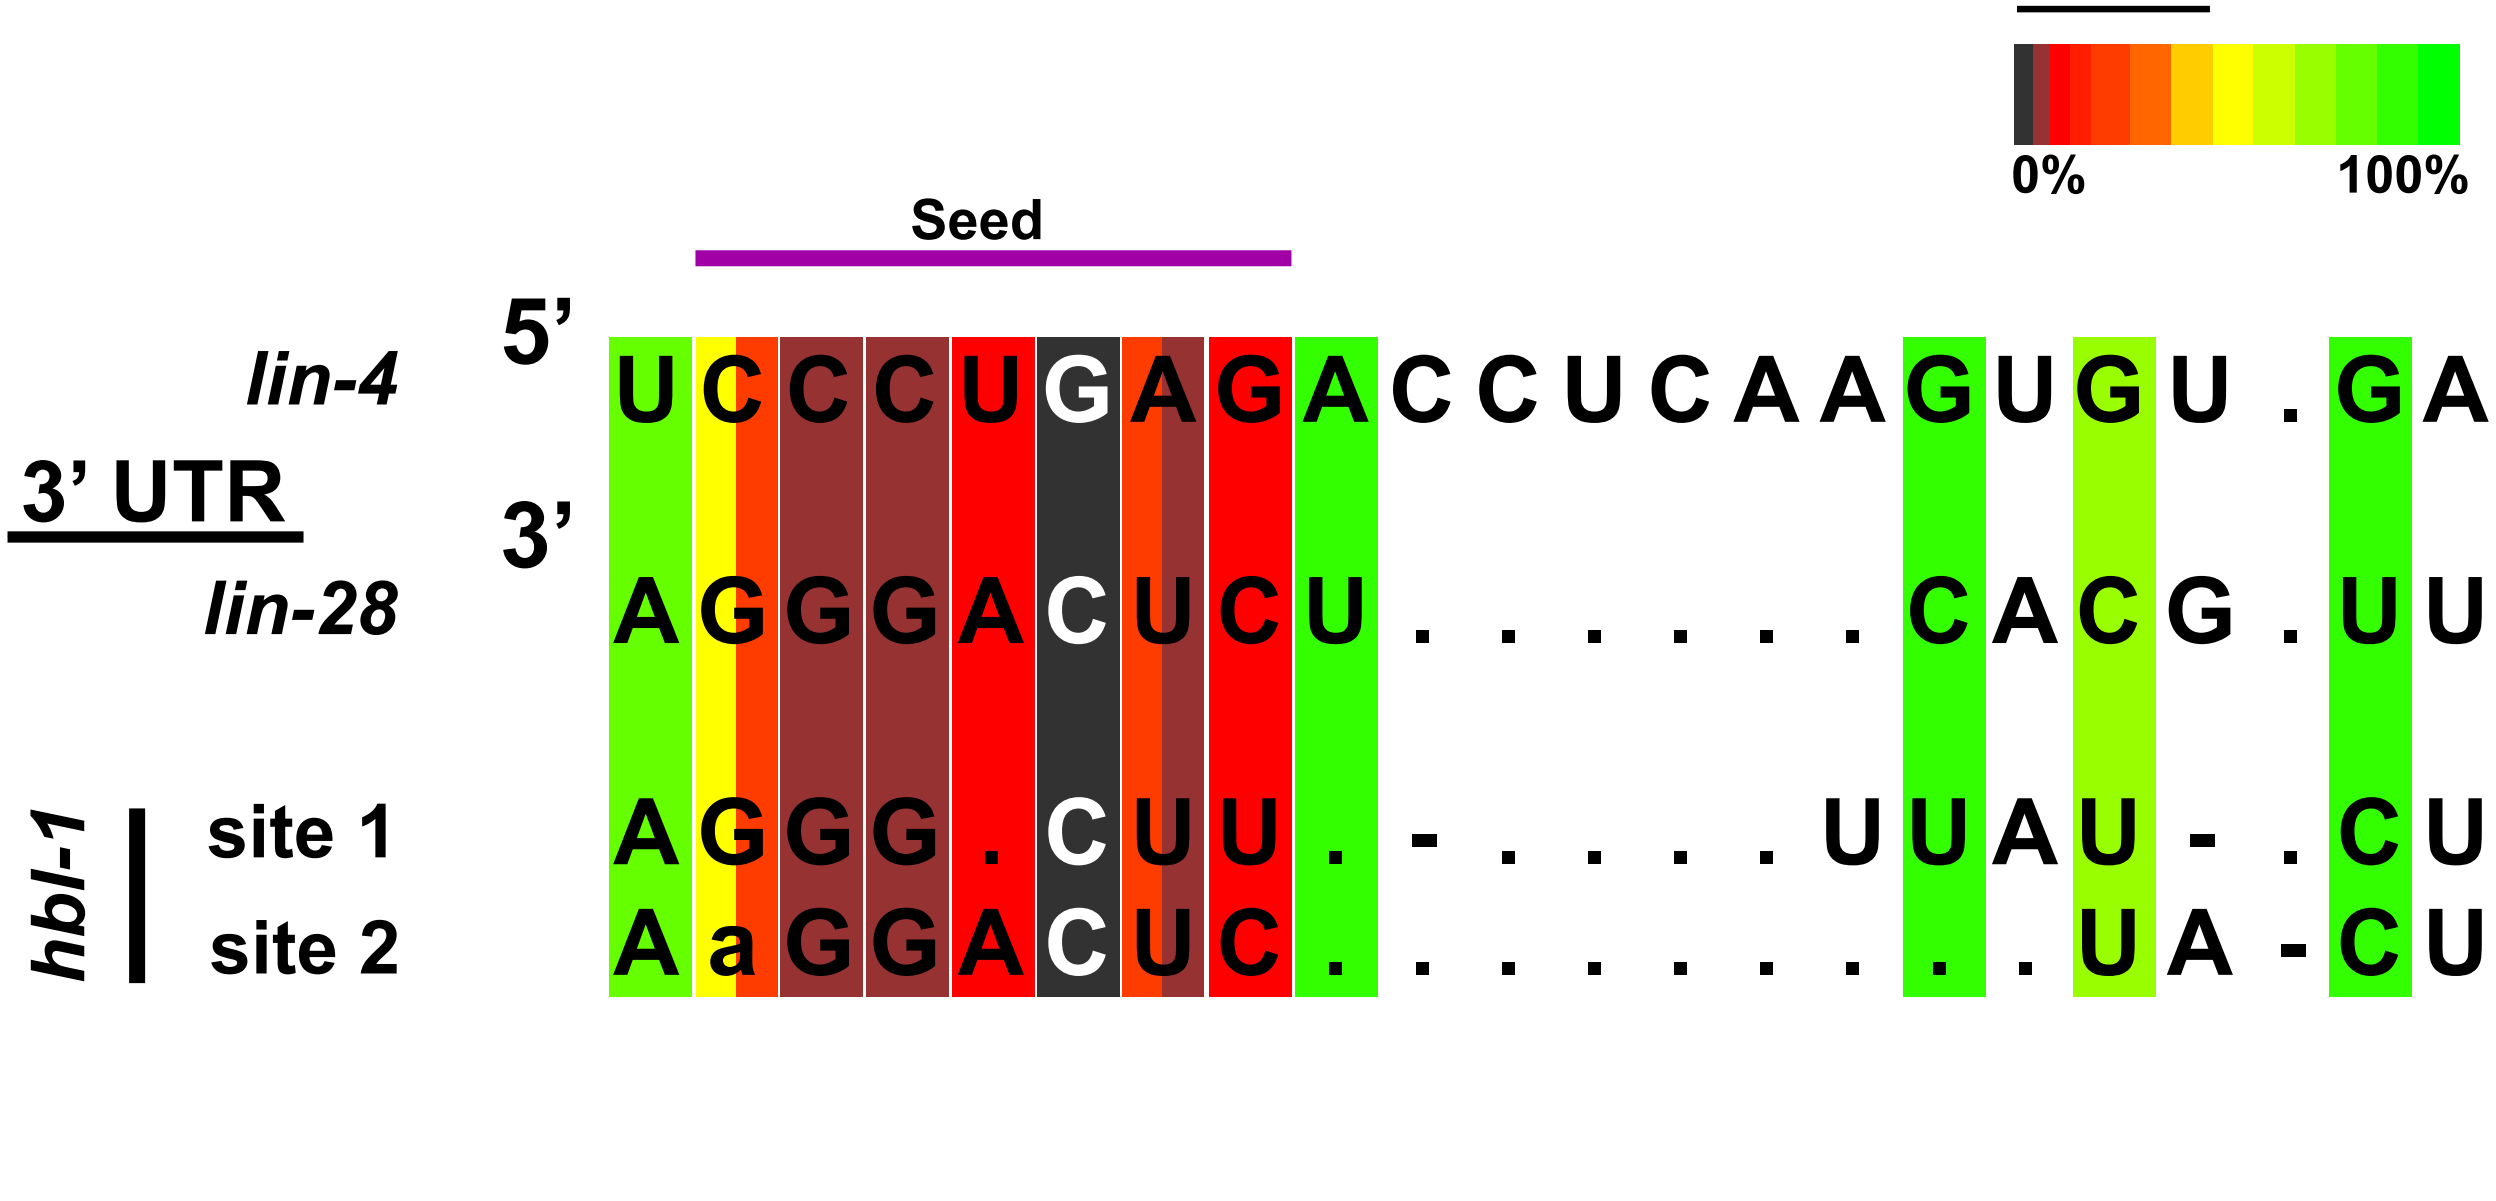

Figure S2Di

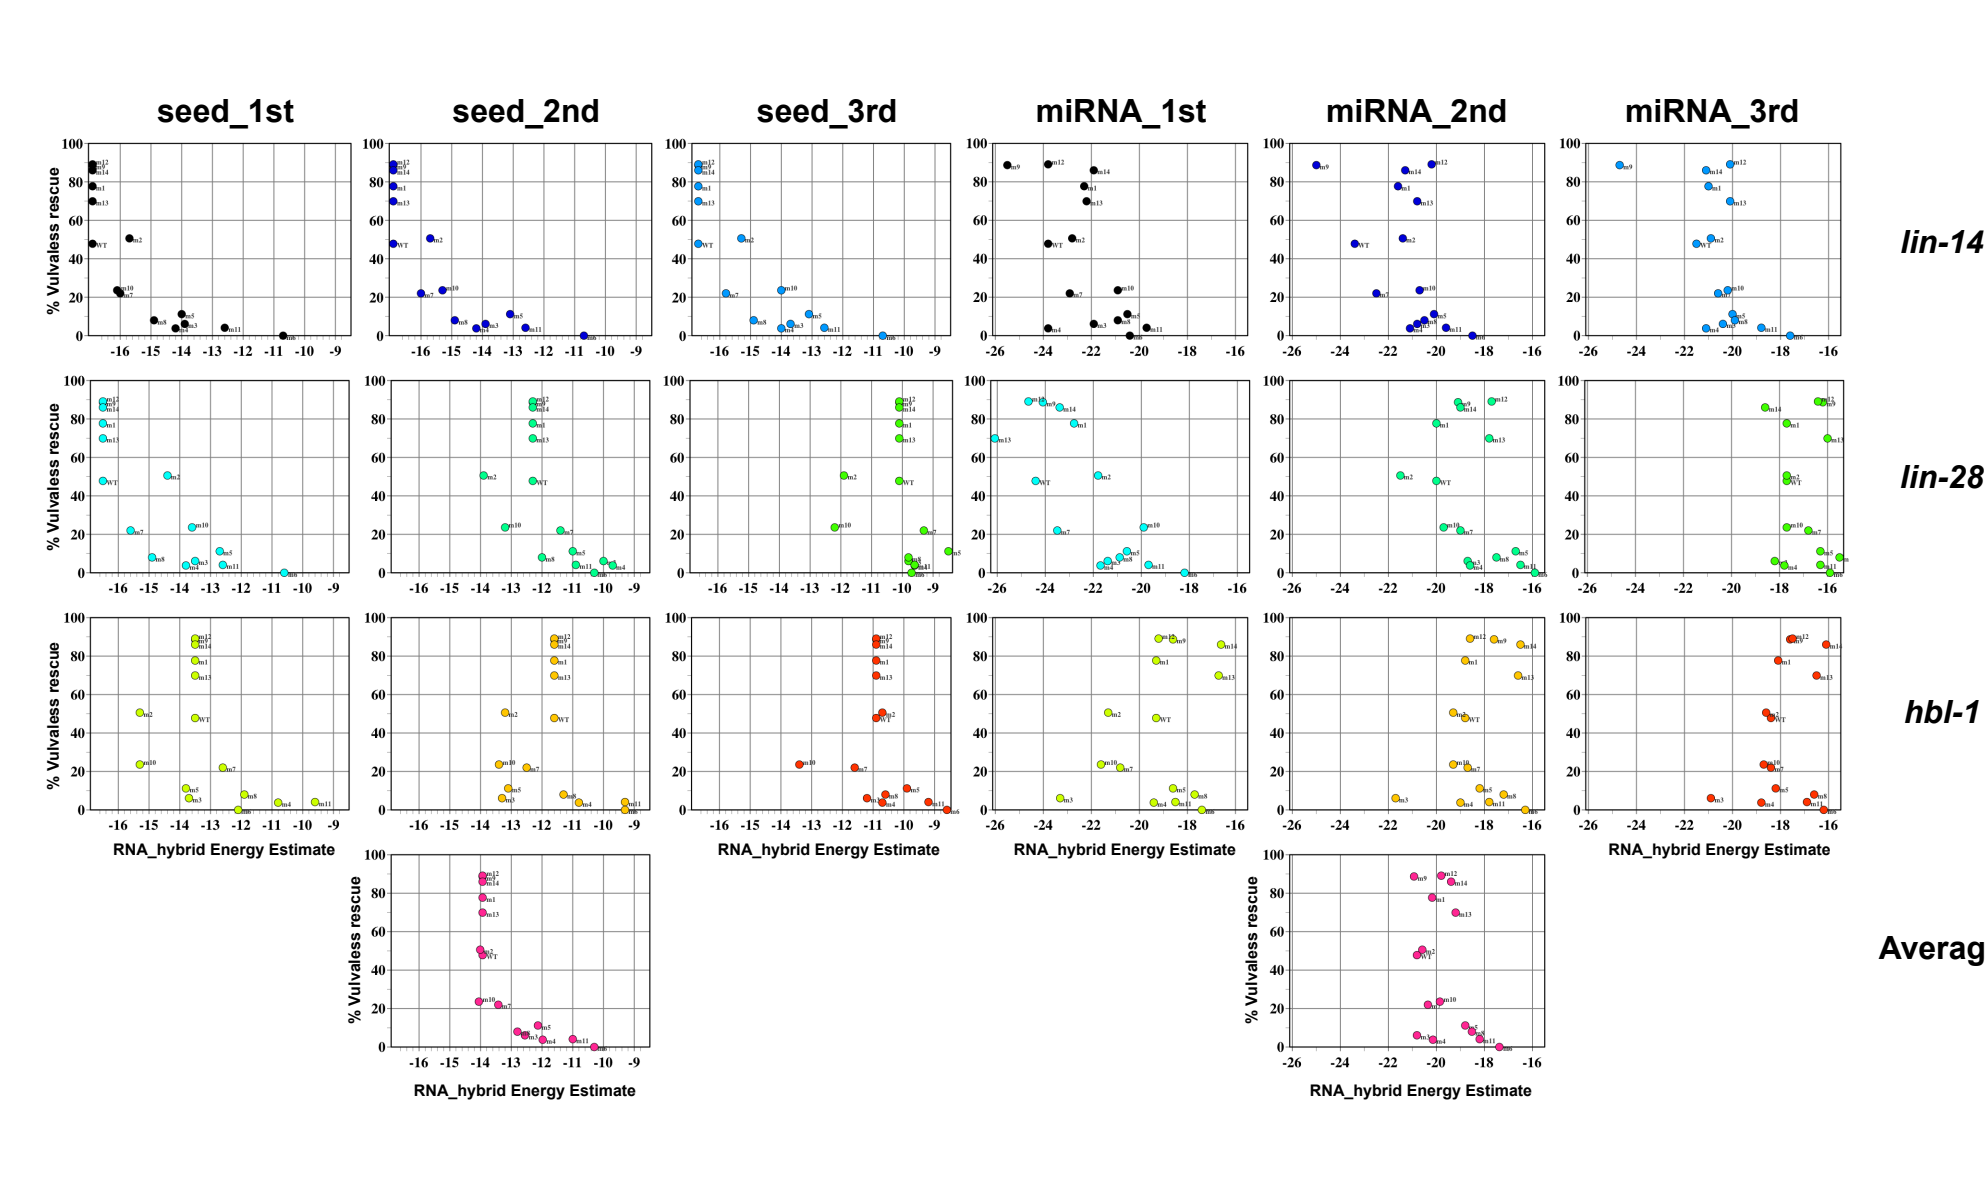

Figure S2Dii

| Mutation | Minimum free energy (lin-4 mature microRNA) |       |       |        |       |       |       |       |       | % Vulval rescue |         |
|----------|---------------------------------------------|-------|-------|--------|-------|-------|-------|-------|-------|-----------------|---------|
|          | lin-14                                      |       |       | lin-28 |       |       | hbl-1 |       |       |                 | Average |
|          | 1st                                         | 2nd   | 3rd   | 1st    | 2nd   | 3rd   | 1st   | 2nd   | 3rd   |                 |         |
| WT       | -23.8                                       | -23.4 | -21.5 | -24.4  | -20.0 | -17.7 | -19.3 | -18.8 | -18.4 | -20.8           | 47.8    |
| m1       | -22.3                                       | -21.6 | -21.0 | -22.8  | -20.0 | -17.7 | -19.3 | -18.8 | -18.1 | -20.2           | 77.7    |
| m2       | -22.8                                       | -21.4 | -20.9 | -21.8  | -21.5 | -17.7 | -21.3 | -19.3 | -18.6 | -20.6           | 50.6    |
| m3       | -21.9                                       | -20.8 | -20.4 | -21.4  | -18.7 | -18.2 | -23.3 | -21.7 | -20.9 | -20.8           | 6.1     |
| m4       | -23.8                                       | -20.1 | -21.1 | -21.7  | -18.6 | -17.8 | -19.4 | -19.0 | -18.8 | -20.1           | 3.8     |
| m5       | -20.5                                       | -20.1 | -20.0 | -20.6  | -16.7 | -16.3 | -18.6 | -18.2 | -18.2 | -18.8           | 11.2    |
| m6       | -20.4                                       | -18.5 | -17.6 | -18.2  | -15.9 | -15.9 | -17.4 | -16.3 | -16.2 | -17.4           | 0.0     |
| m7       | -22.9                                       | -22.5 | -20.6 | -23.5  | -19.0 | -16.8 | -20.8 | -18.7 | -18.4 | -20.4           | 22.0    |
| m8       | -20.9                                       | -20.5 | -19.9 | -20.9  | -17.5 | -15.5 | -17.7 | -17.2 | -16.6 | -18.5           | 8.0     |
| m9       | -25.5                                       | -25.0 | -24.7 | -24.1  | -19.1 | -16.2 | -18.6 | -17.6 | -17.6 | -20.9           | 88.7    |
| m10      | -20.9                                       | -20.7 | -20.2 | -19.9  | -19.7 | -17.7 | -21.6 | -19.3 | -18.7 | -19.9           | 23.6    |
| m11      | -19.7                                       | -19.6 | -18.8 | -19.7  | -16.5 | -16.3 | -18.5 | -17.8 | -16.9 | -18.2           | 4.1     |
| m12      | -23.8                                       | -20.2 | -20.1 | -24.7  | -17.7 | -16.4 | -19.2 | -18.6 | -17.5 | -19.8           | 89.1    |

Figure S3A

| let7_m1       | % Egg-laying | % Pvl | % Bursting | Total | % Rescue (bursting) |
|---------------|--------------|-------|------------|-------|---------------------|
| Line          | 92.8         | 7.2   | 0.0        | 97    | 100.0               |
| #203z.2.1.1   | 91.1         | 8.9   | 0.0        | 101   | 100.0               |
| Average       | 91.9         | 8.1   | 0.0        | -     | 100.0               |
| Error of mean | 0.8          | 0.8   | 0.0        | -     | 0.0                 |

  

| let7_m2       | % Egg-laying | % Pvl | % Bursting | Total | % Rescue (bursting) |
|---------------|--------------|-------|------------|-------|---------------------|
| Line          | 51.5         | 29.9  | 18.6       | 97    | 81.4                |
| #205z.1.1.0   | 51.5         | 29.9  | 18.6       | 97    | 81.4                |
| Average       | 51.5         | 29.9  | 18.6       | -     | 81.4                |
| Error of mean | 0.0          | 0.0   | 0.0        | -     | 0.0                 |

  

| let7_m3       | % Egg-laying | % Pvl | % Bursting | Total | % Rescue (bursting) |
|---------------|--------------|-------|------------|-------|---------------------|
| Line          | 24.5         | 64.2  | 11.3       | 106   | 88.7                |
| #225.3.1.0    | 5.0          | 51.0  | 44.0       | 100   | 56.0                |
| Average       | 14.8         | 57.6  | 27.7       | -     | 72.4                |
| Error of mean | 9.8          | 6.6   | 16.3       | -     | 16.3                |

  

| let7_m4       | % Egg-laying | % Pvl | % Bursting | Total | % Rescue (bursting) |
|---------------|--------------|-------|------------|-------|---------------------|
| Line          | 27.6         | 51.0  | 21.4       | 98    | 78.6                |
| #220.3.2.1    | 26.1         | 49.6  | 24.3       | 115   | 75.7                |
| #221.2.1.1    | 18.0         | 60.0  | 22.0       | 100   | 78.0                |
| #221.2.2.1    | 15.3         | 52.3  | 32.4       | 111   | 67.6                |
| Average       | 21.7         | 53.2  | 25.1       | -     | 74.9                |
| Error of mean | 3.0          | 2.3   | 2.5        | -     | 2.5                 |

  

| let7_m5       | % Egg-laying | % Pvl | % Bursting | Total | % Rescue (bursting) |
|---------------|--------------|-------|------------|-------|---------------------|
| Line          | 57.1         | 42.1  | 0.0        | 133   | 99.2                |
| #260.2.2.1    | 57.1         | 42.9  | 0.0        | 98    | 100.0               |
| Average       | 57.1         | 42.5  | 0.0        | -     | 99.6                |
| Error of mean | 0.0          | 0.4   | 0.4        | -     | 0.4                 |

  

| let7_m6       | % Egg-laying | % Pvl | % Bursting | Total | % Rescue (bursting) |
|---------------|--------------|-------|------------|-------|---------------------|
| Line          | 33.7         | 65.2  | 1.1        | 89    | 98.9                |
| #248a.1.1.0   | 33.7         | 65.2  | 1.1        | 89    | 98.9                |
| Average       | 33.7         | 65.2  | 1.1        | -     | 98.9                |
| Error of mean | 0.0          | 0.0   | 0.0        | -     | 0.0                 |

  

| let7_m7       | % Egg-laying | % Pvl | % Bursting | Total | % Rescue (bursting) |
|---------------|--------------|-------|------------|-------|---------------------|
| Line          | 82.5         | 17.5  | 0.0        | 120   | 100.0               |
| #227.1.1.0    | 82.5         | 17.5  | 0.0        | 120   | 100.0               |
| Average       | 82.5         | 17.5  | 0.0        | -     | 100.0               |
| Error of mean | 0.0          | 0.0   | 0.0        | -     | 0.0                 |

  

| let7_m8       | % Egg-laying | % Pvl | % Bursting | Total | % Rescue (bursting) |
|---------------|--------------|-------|------------|-------|---------------------|
| Line          | 66.4         | 32.8  | 0.9        | 116   | 99.1                |
| #249.1.1.1    | 43.6         | 46.4  | 10.0       | 140   | 90.0                |
| #259.1.1.1    | 42.6         | 48.5  | 8.9        | 101   | 91.1                |
| #259.1.2.1    | 49.6         | 47.1  | 3.3        | 121   | 96.7                |
| Average       | 50.5         | 43.7  | 5.8        | -     | 94.2                |
| Error of mean | 5.5          | 3.7   | 2.2        | -     | 2.2                 |

  

| let7_m9       | % Egg-laying | % Pvl | % Bursting | Total | % Rescue (bursting) |
|---------------|--------------|-------|------------|-------|---------------------|
| Line          | 57.9         | 38.9  | 3.2        | 95    | 96.8                |
| #247.1.1.1    | 57.9         | 38.9  | 3.2        | 95    | 96.8                |
| Average       | 57.9         | 38.9  | 3.2        | -     | 96.8                |
| Error of mean | 0.0          | 0.0   | 0.0        | -     | 0.0                 |

  

| let7_m10      | % Egg-laying | % Pvl | % Bursting | Total | % Rescue (bursting) |
|---------------|--------------|-------|------------|-------|---------------------|
| Line          | 66.1         | 33.1  | 0.8        | 118   | 99.2                |
| #258.1.1.1    | 59.5         | 36.9  | 3.6        | 111   | 96.4                |
| Average       | 62.8         | 35.0  | 2.2        | -     | 97.8                |
| Error of mean | 3.3          | 1.9   | 1.4        | -     | 1.4                 |

  

| let7_m11      | % Egg-laying | % Pvl | % Bursting | Total | % Rescue (bursting) |
|---------------|--------------|-------|------------|-------|---------------------|
| Line          | 4.2          | 68.4  | 27.4       | 95    | 72.6                |
| #256.1.1.1    | 4.2          | 68.4  | 27.4       | 95    | 72.6                |
| Average       | 4.2          | 68.4  | 27.4       | -     | 72.6                |
| Error of mean | 0.0          | 0.0   | 0.0        | -     | 0.0                 |

  

| let7_m12      | % Egg-laying | % Pvl | % Bursting | Total | % Rescue (bursting) |
|---------------|--------------|-------|------------|-------|---------------------|
| Line          | 43.4         | 45.6  | 11.0       | 136   | 89.0                |
| #245.2.1.0    | 42.7         | 43.6  | 13.6       | 110   | 86.4                |
| #245.2.1.2    | 21.4         | 60.0  | 18.9       | 90    | 81.1                |
| #245.2.2.0    | 45.2         | 49.0  | 5.8        | 104   | 94.2                |
| #254.1.1.0    | 35.1         | 35.1  | 29.8       | 114   | 70.2                |
| Average       | 37.5         | 46.7  | 15.8       | -     | 84.2                |
| Error of mean | 4.4          | 4.0   | 4.1        | -     | 4.1                 |

  

| let7_m13      | % Egg-laying | % Pvl | % Bursting | Total | % Rescue (bursting) |
|---------------|--------------|-------|------------|-------|---------------------|
| Line          | 9.9          | 29.5  | 60.7       | 61    | 39.3                |
| #253.1.1.1    | 13.1         | 51.2  | 35.7       | 84    | 64.3                |
| #253.2.1.2    | 31.3         | 88.6  | 10.1       | 99    | 89.9                |
| #253.2.2.0    | 34.6         | 62.8  | 2.6        | 78    | 97.4                |
| #253.2.4.1    | 32.0         | 54.0  | 14.0       | 100   | 86.0                |
| #253.2.5.0    | 30.4         | 53.0  | 16.5       | 115   | 83.5                |
| #244.2.4.0    | 38.4         | 52.7  | 17.0       | 112   | 83.0                |
| #244.2.1.1    | 5.7          | 14.8  | 79.5       | 88    | 20.5                |
| Average       | 23.4         | 47.1  | 29.5       | -     | 70.5                |
| Error of mean | 5.3          | 8.4   | 13.7       | -     | 13.7                |

  

| let7_seedmut  | % Egg-laying | % Pvl | % Bursting | Total | % Rescue (bursting) |
|---------------|--------------|-------|------------|-------|---------------------|
| Line          | 0.0          | 4.0   | 96.0       | 80    | 4.0                 |
| #230.1.3.0    | 0.0          | 0.0   | 100.0      | 95    | 0.0                 |
| #230.1.3.1    | 0.0          | 0.8   | 99.2       | 130   | 0.8                 |
| Average       | 0.0          | 1.6   | 98.4       | -     | 1.6                 |
| Error of mean | 0.0          | 1.2   | 1.2        | -     | 1.2                 |

  

| let7_strandswap | % Egg-laying | % Pvl | % Bursting | Total | % Rescue (bursting) |
|-----------------|--------------|-------|------------|-------|---------------------|
| Line            | 74.2         | 15.9  | 8.8        | 132   | 93.1                |
| #232.1.1.0      | 74.1         | 23.1  | 2.8        | 108   | 97.2                |
| #233.1.2.0      | 85.7         | 12.5  | 1.8        | 112   | 98.2                |
| Average         | 78.0         | 18.2  | 3.8        | -     | 96.2                |
| Error of mean   | 3.9          | 3.1   | 1.5        | -     | 1.6                 |

  

| WT let-7      | % Egg-laying | % Pvl | % Bursting | Total | % Rescue (bursting) |
|---------------|--------------|-------|------------|-------|---------------------|
| Line          | 72.7         | 25.1  | 1.1        | 118   | 94.9                |
| C29.2.1.0     | 58.5         | 36.4  | 5.1        | 77    | 97.4                |
| C29.2.2.0     | 54.5         | 42.9  | 2.6        | 77    | 97.4                |
| Average       | 61.9         | 35.1  | 2.9        | -     | 97.0                |
| Error of mean | 5.5          | 4.9   | 1.2        | -     | 1.2                 |

Figure S3B

| let7_m1       | % with adult alae | Total |
|---------------|-------------------|-------|
| Line          | 100.0             | 48    |
| #203z.4.1.1   | 100.0             | 48    |
| Average       | 100.0             | -     |
| Error of mean | 0.0               | -     |

  

| let7_m2       | % with adult alae | Total |
|---------------|-------------------|-------|
| Line          | 100.0             | 51    |
| #205z.1.1.0   | 100.0             | 51    |
| Average       | 100.0             | -     |
| Error of mean | 0.0               | -     |

  

| let7_m3       | % with adult alae | Total |
|---------------|-------------------|-------|
| Line          | 2.1               | 48    |
| #225.3.1.0    | 0.0               | 48    |
| Average       | 1.0               | -     |
| Error of mean | 1.0               | -     |

  

| let7_m4       | % with adult alae | Total |
|---------------|-------------------|-------|
| Line          | 55.6              | 54    |
| #221.2.1.0    | 79.2              | 48    |
| #221.2.2.1    | 59.0              | 48    |
| #220.3.2.1    | 50.0              | 48    |
| Average       | 58.7              | -     |
| Error of mean | 7.0               | -     |

  

| let7_m5       | % with adult alae | Total |
|---------------|-------------------|-------|
| Line          | 82.0              | 50    |
| #260.2.2.1    | 78.0              | 50    |
| Average       | 80.0              | -     |
| Error of mean | 2.0               | -     |

  

| let7_m6       | % with adult alae | Total |
|---------------|-------------------|-------|
| Line          | 50.8              | 61    |
| #248a.1.1.0   | 50.8              | 61    |
| Average       | 50.8              | -     |
| Error of mean | 0.0               | -     |

  

| let7_m7       | % with adult alae | Total |
|---------------|-------------------|-------|
| Line          | 83.3              | 54    |
| #227.1.1.0    | 83.3              | 54    |
| Average       | 83.3              | -     |
| Error of mean | 0.0               | -     |

  

| let7_m8       | % with adult alae | Total |
|---------------|-------------------|-------|
| Line          | 47.2              | 53    |
| #249.1.1.1    | 35.3              | 51    |
| #259.1.1.1    | 28.9              | 52    |
| #259.1.2.1    | 33.3              | 48    |
| Average       | 35.7              | -     |
| Error of mean | 4.2               | -     |

  

| let7_m9       | % with adult alae | Total |
|---------------|-------------------|-------|
| Line          | 93.9              | 49    |
| #247.1.1.1    | 93.9              | 49    |
| Average       | 93.9              | -     |
| Error of mean | 0.0               | -     |

  

| let7_m10      | % with adult alae | Total |
|---------------|-------------------|-------|
| Line          | 100.0             | 41    |
| #258.1.1.1    | 85.1              | 47    |
| Average       | 92.6              | -     |
| Error of mean | 7.5               | -     |

  

| let7_m11      | % with adult alae | Total |
|---------------|-------------------|-------|
| Line          | 5.7               | 53    |
| #256.1.1.1    | 5.7               | 53    |
| Average       | 5.7               | -     |
| Error of mean | 0.0               | -     |

  

| let7_m12      | % with adult alae | Total |
|---------------|-------------------|-------|
| Line          | 35.2              | 54    |
| #254.1.1.0    | 20.8              | 53    |
| #245.2.1.1    | 14.6              | 48    |
| #245.2.1.2    | 30.6              | 62    |
| #245.2.2.0    | 17.9              | 56    |
| Average       | 23.8              | -     |
| Error of mean | 3.9               | -     |

  

| let7_m13      | % with adult alae | Total |
|---------------|-------------------|-------|
| Line          | 20.0              | 55    |
| #253.1.1.1    | 10.4              | 48    |
| #253.2.1.2    | 7.3               | 55    |
| #253.2.2.0    | 6.0               | 50    |
| #253.2.4.1    | 10.4              | 48    |
| #253.2.5.0    | 11.1              | 54    |
| #244.2.1.1    | 18.0              | 50    |
| #244.2.4.0    | 28.1              | 57    |
| Average       | 13.9              | -     |
| Error of mean | 2.7               | -     |

  

| let7_strandswap | % with adult alae | Total |
|-----------------|-------------------|-------|
| Line            | 87.0              | 54    |
| #232.1.1.0      | 100.0             | 48    |
| #233.1.2.0      | 93.8              | 48    |
| Average         | 93.8              | -     |
| Error of mean   | 3.8               | -     |

  

| WT let-7      | % with adult alae | Total |
|---------------|-------------------|-------|
| Line          | 90.7              | 54    |
| C29.2.1.0     | 100.0             | 46    |
| C29.2.1.1     | 90.7              | 49    |
| C29.2.2.0     | 96.2              | 49    |
| Average       | 96.2              | -     |
| Error of mean | 2.8               | -     |

Figure S3C

| Strains         | # let-7 reads | % microRNAs | total reads |
|-----------------|---------------|-------------|-------------|
| N2              | 98,447        | 6.82        | 3,423,171   |
| let7_m1         | 20,858        | 4.52        | 1,014,126   |
| let7_m2         | 5,335         | 1.10        | 206,735     |
| let7_m3         | 398           | 0.82        | 260,682     |
| let7_m4         | 17            | 1.86        | 7,428       |
| let7_m7         | 863           | 0.82        | 369,456     |
| let7_m7         | 591           | 1.16        | 262,801     |
| let7_strandswap | 61            | 0.53        | 118,634     |
| let7_strandswap | 114           | 0.53        | 204,384     |

Figure S3Di

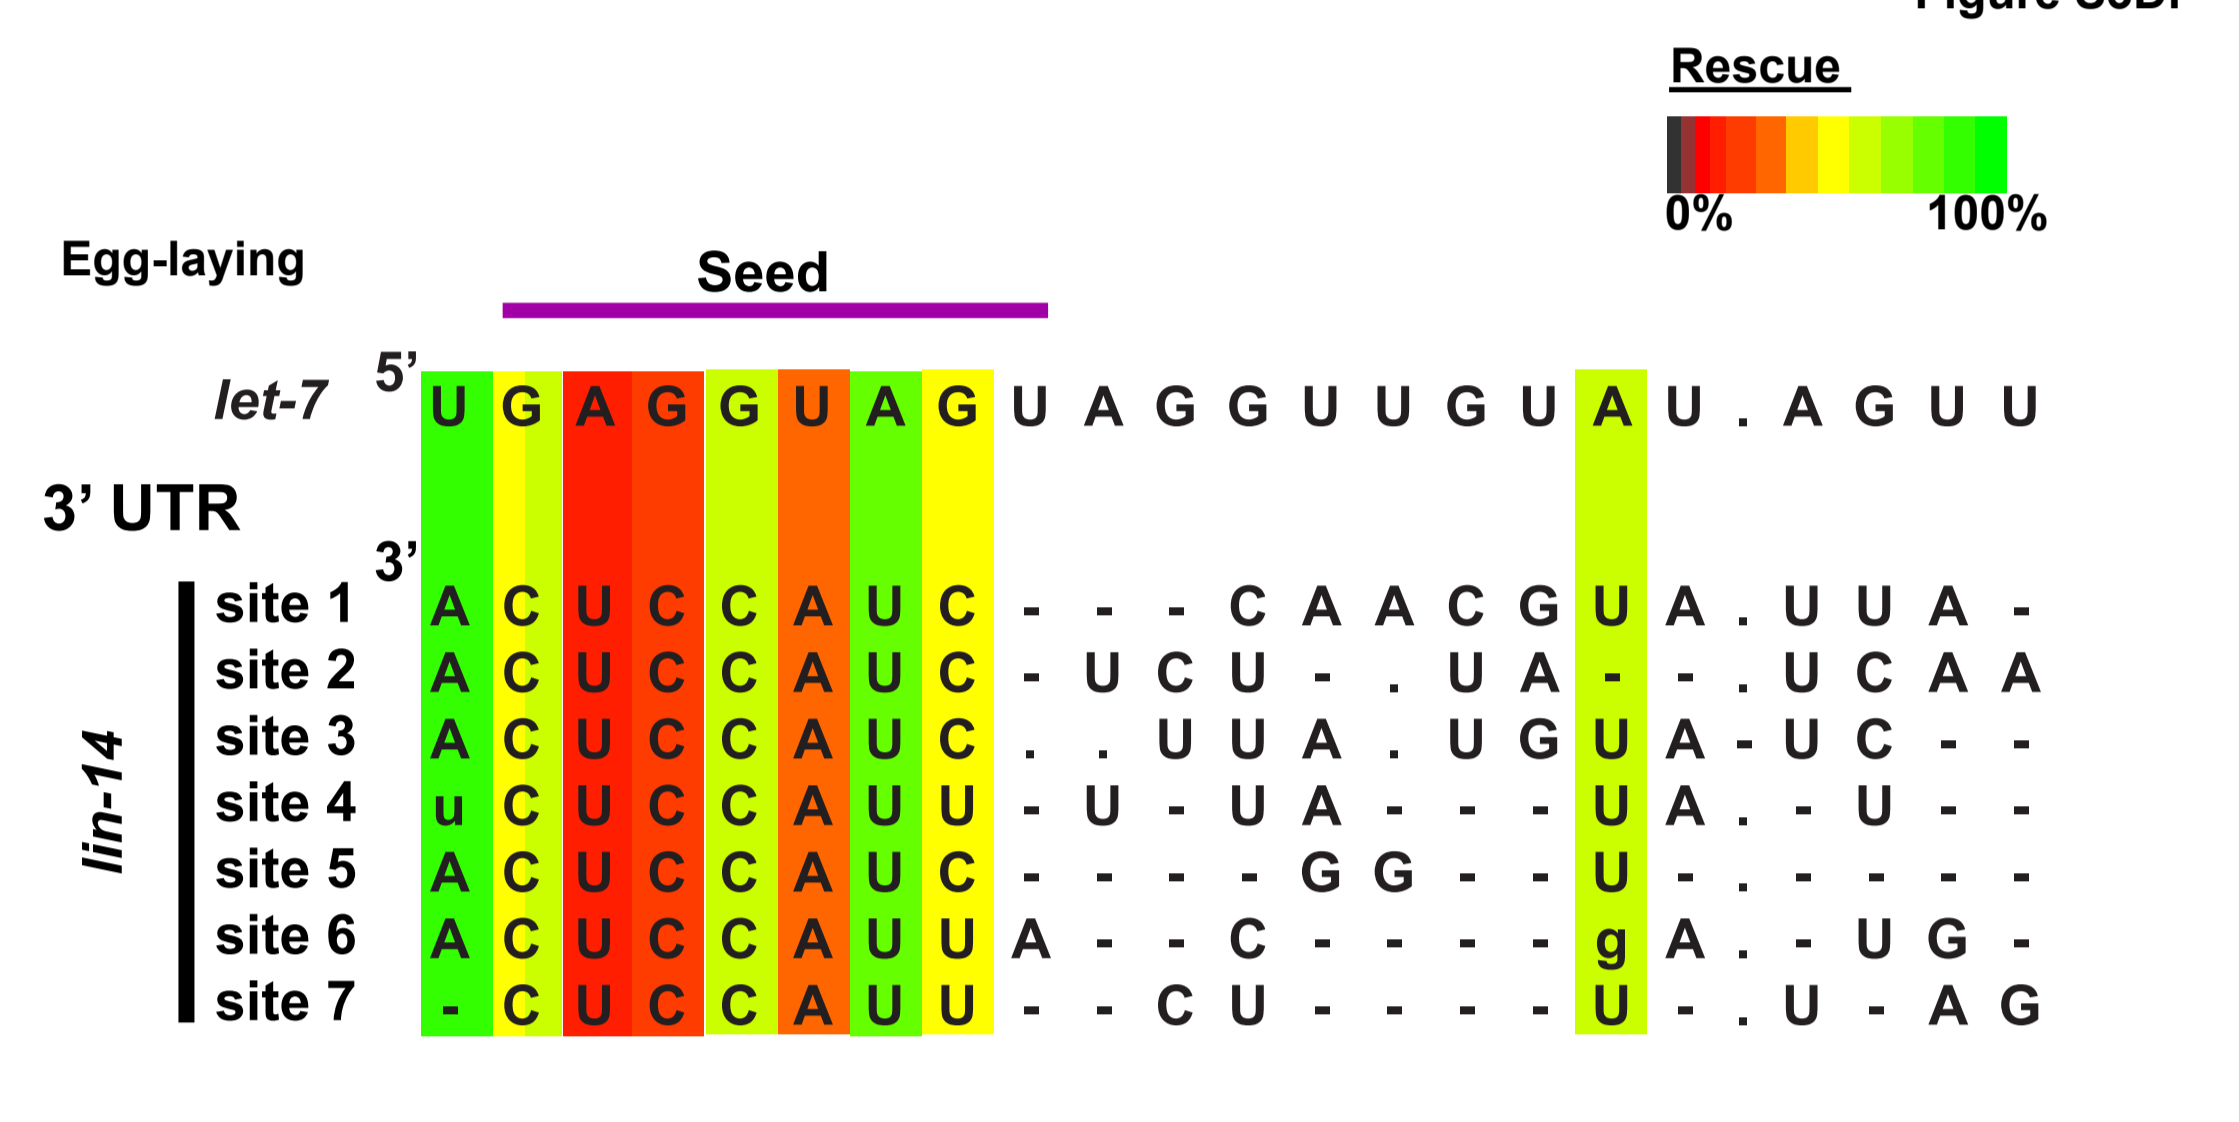

Figure S3Dii

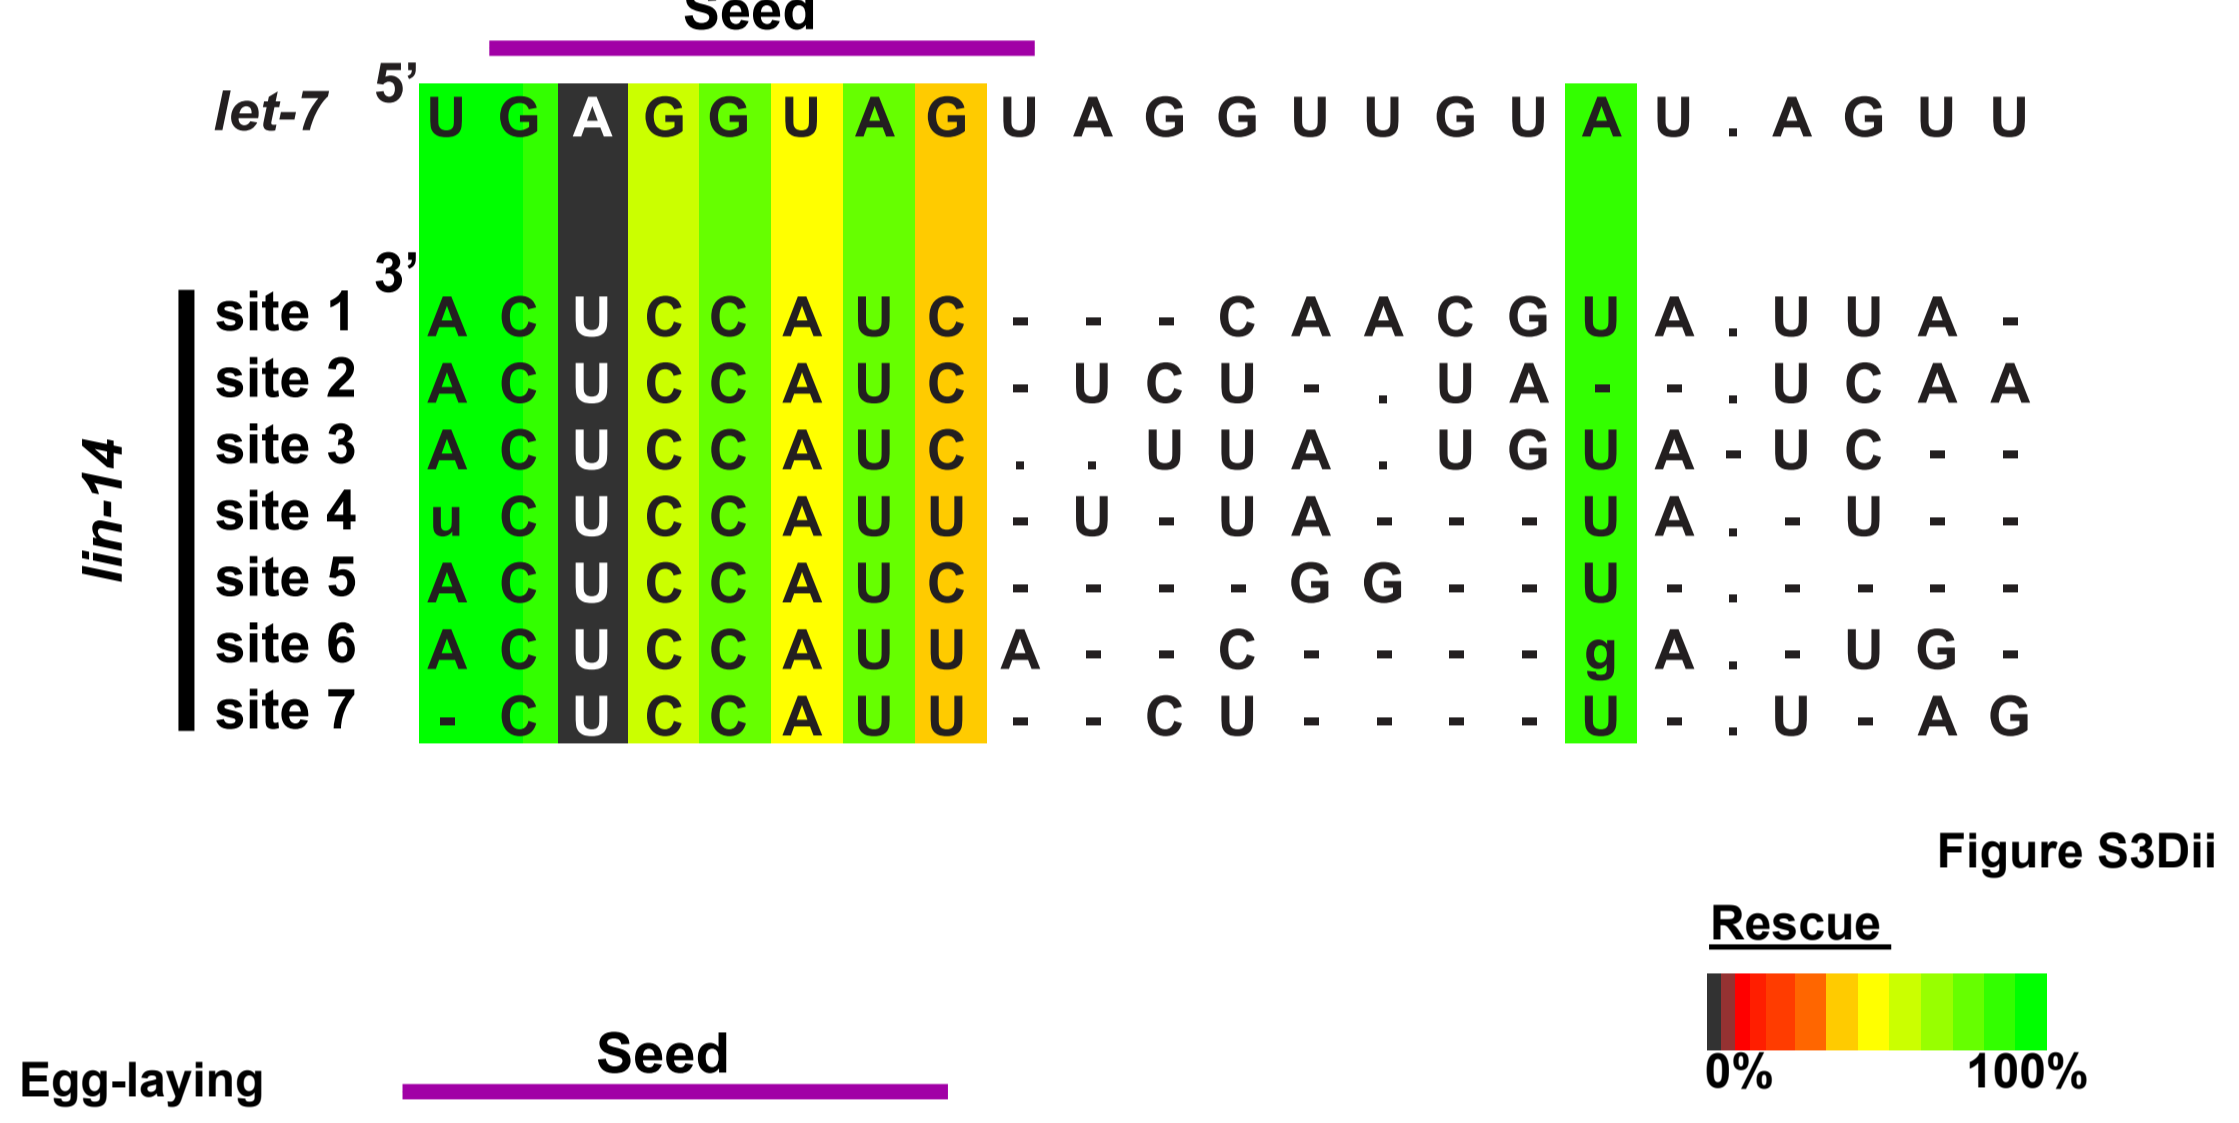

Figure S3Diii

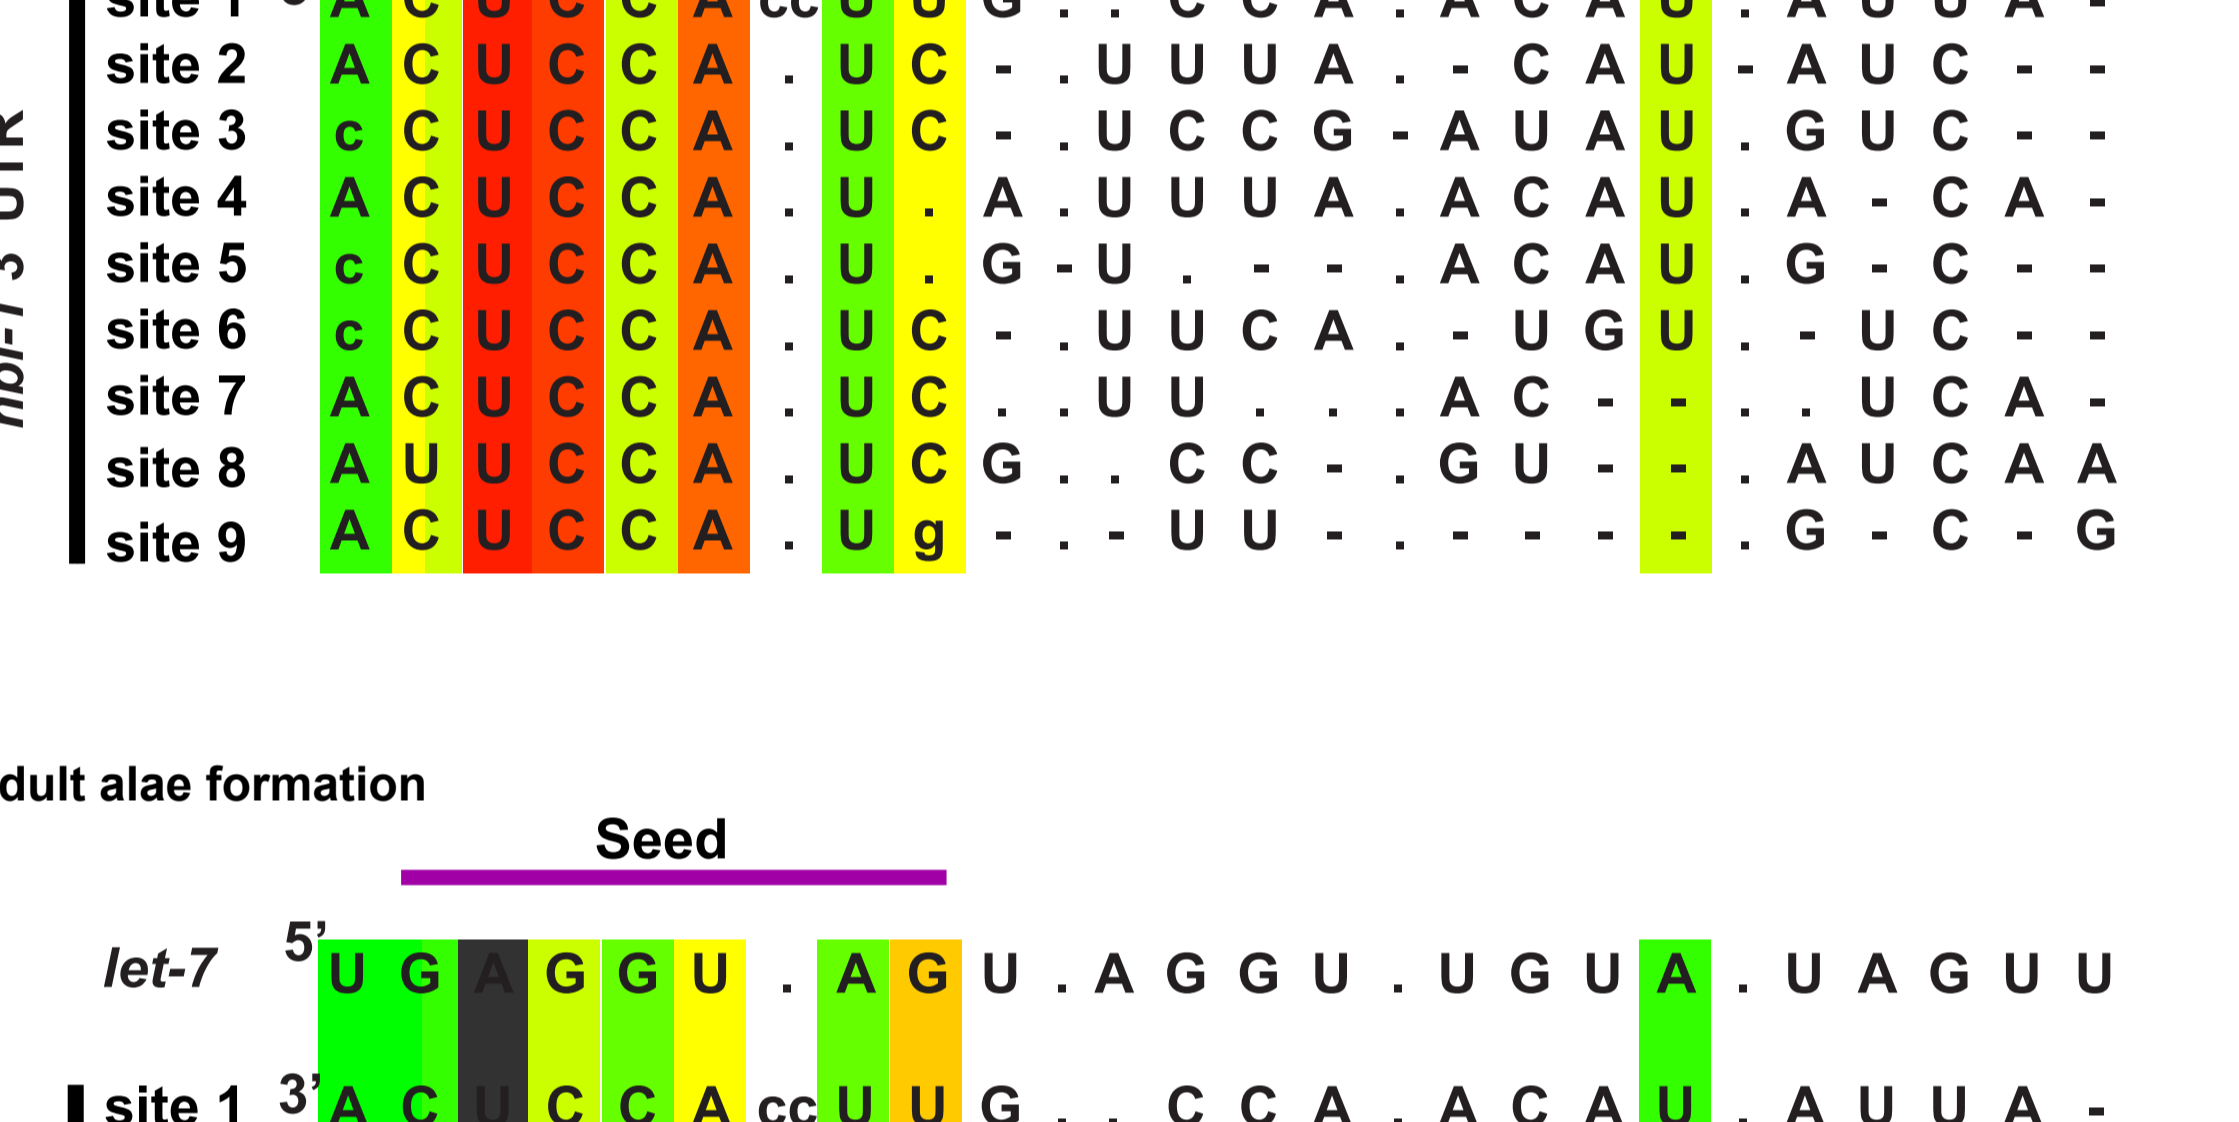

Figure S3Ei

Figure S3Eii

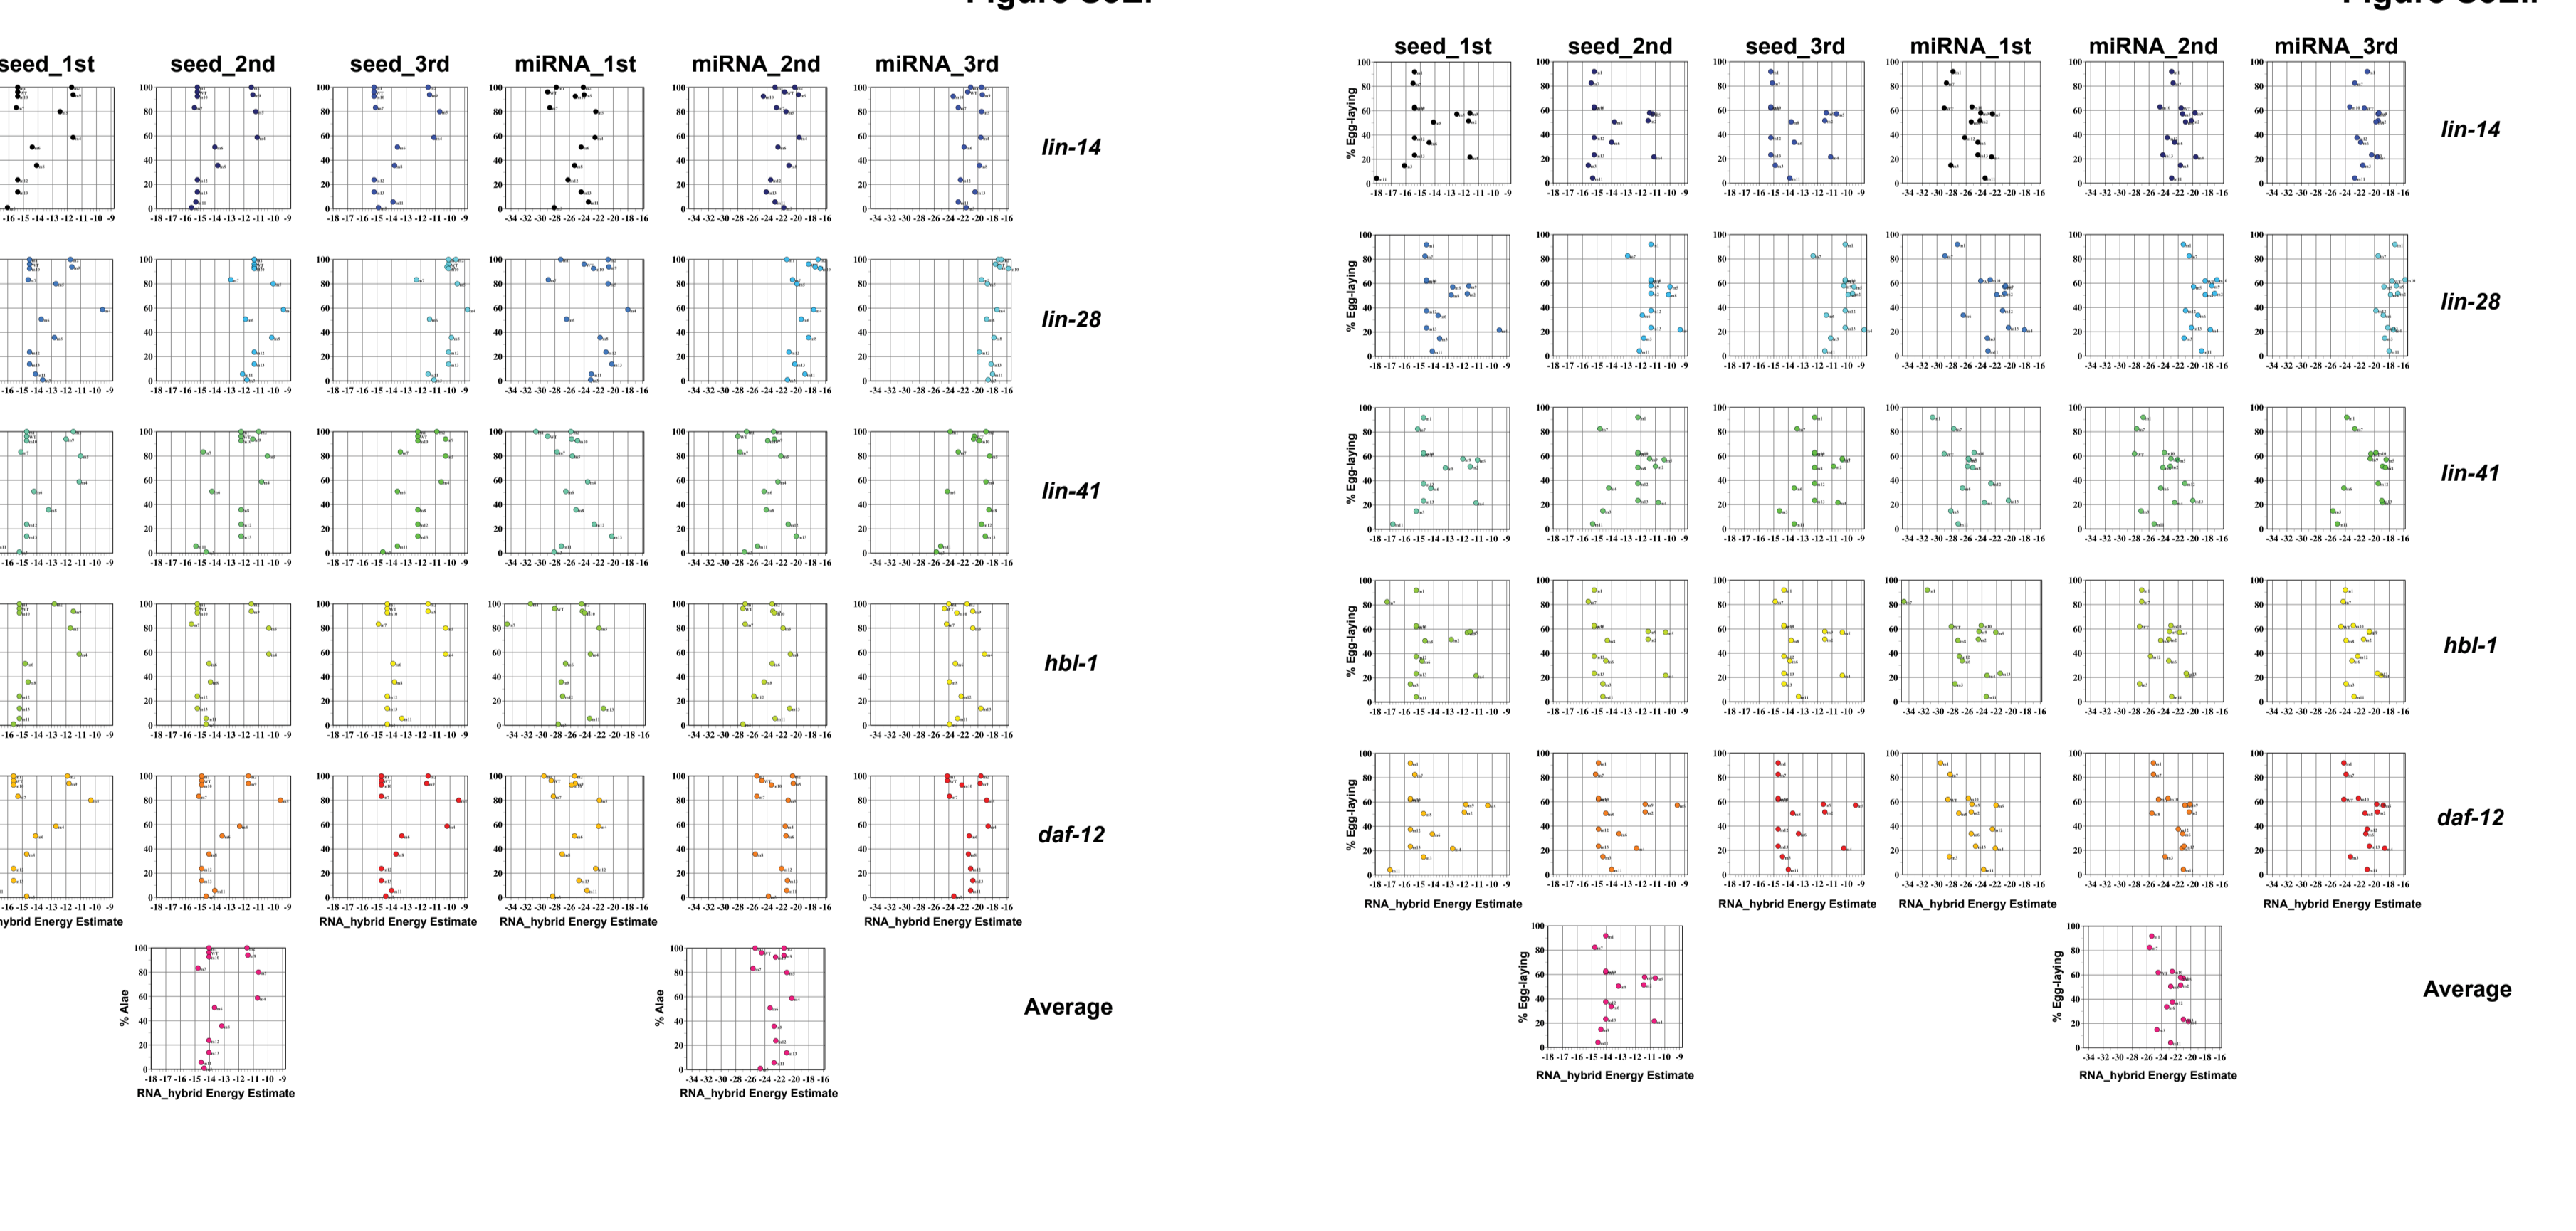

Figure S3Eiii

| Mutation | Minimum free energy (let-7 mature microRNA) |  |  |  |  |  |  |  |  |  |  |  |  |  |  | Rescue |  |  |
|----------|---------------------------------------------|--|--|--|--|--|--|--|--|--|--|--|--|--|--|--------|--|--|
|----------|---------------------------------------------|--|--|--|--|--|--|--|--|--|--|--|--|--|--|--------|--|--|
